# Supplementary material for: A New Series of Aryloxyacetic Acids Endowed with Multi-Target Activity towards Peroxisome Proliferator-Activated Receptors (PPARs), Fatty Acid Amide Hydrolase (FAAH), and Acetylcholinesterase (AChE)
Source: MDPI journal article supplement (doi:10.3390/molecules27030958), 2022-01-31
Supplement: s1 [file s1]

# Supporting Information

## A New Series of Aryloxyacetic Acids Endowed with Multi-Target Activity Towards Peroxisome Proliferator-Activated Receptors (PPARs), Fatty Acid Amide Hydrolase (FAAH), and Acetylcholinesterase (AChE)

Rosalba Leuci, Leonardo Brunetti, Antonio Laghezza, Luca Piemontese, Antonio Carrieri, Leonardo Pisani, Paolo Tortorella, Marco Catto, Fulvio Loiodice\*

*Dipartimento di Farmacia-Scienze del Farmaco, Università degli Studi di Bari "Aldo Moro", Via E. Orabona 4, 70125 Bari, Italy*

\* Correspondence: [fulvio.loiodice@uniba.it](mailto:fulvio.loiodice@uniba.it); Tel.: +39-080-5442778

### Table of Contents

Figure S1. Binding mode of the enantiomers of **5** and **11** and references to the selected targets. S2

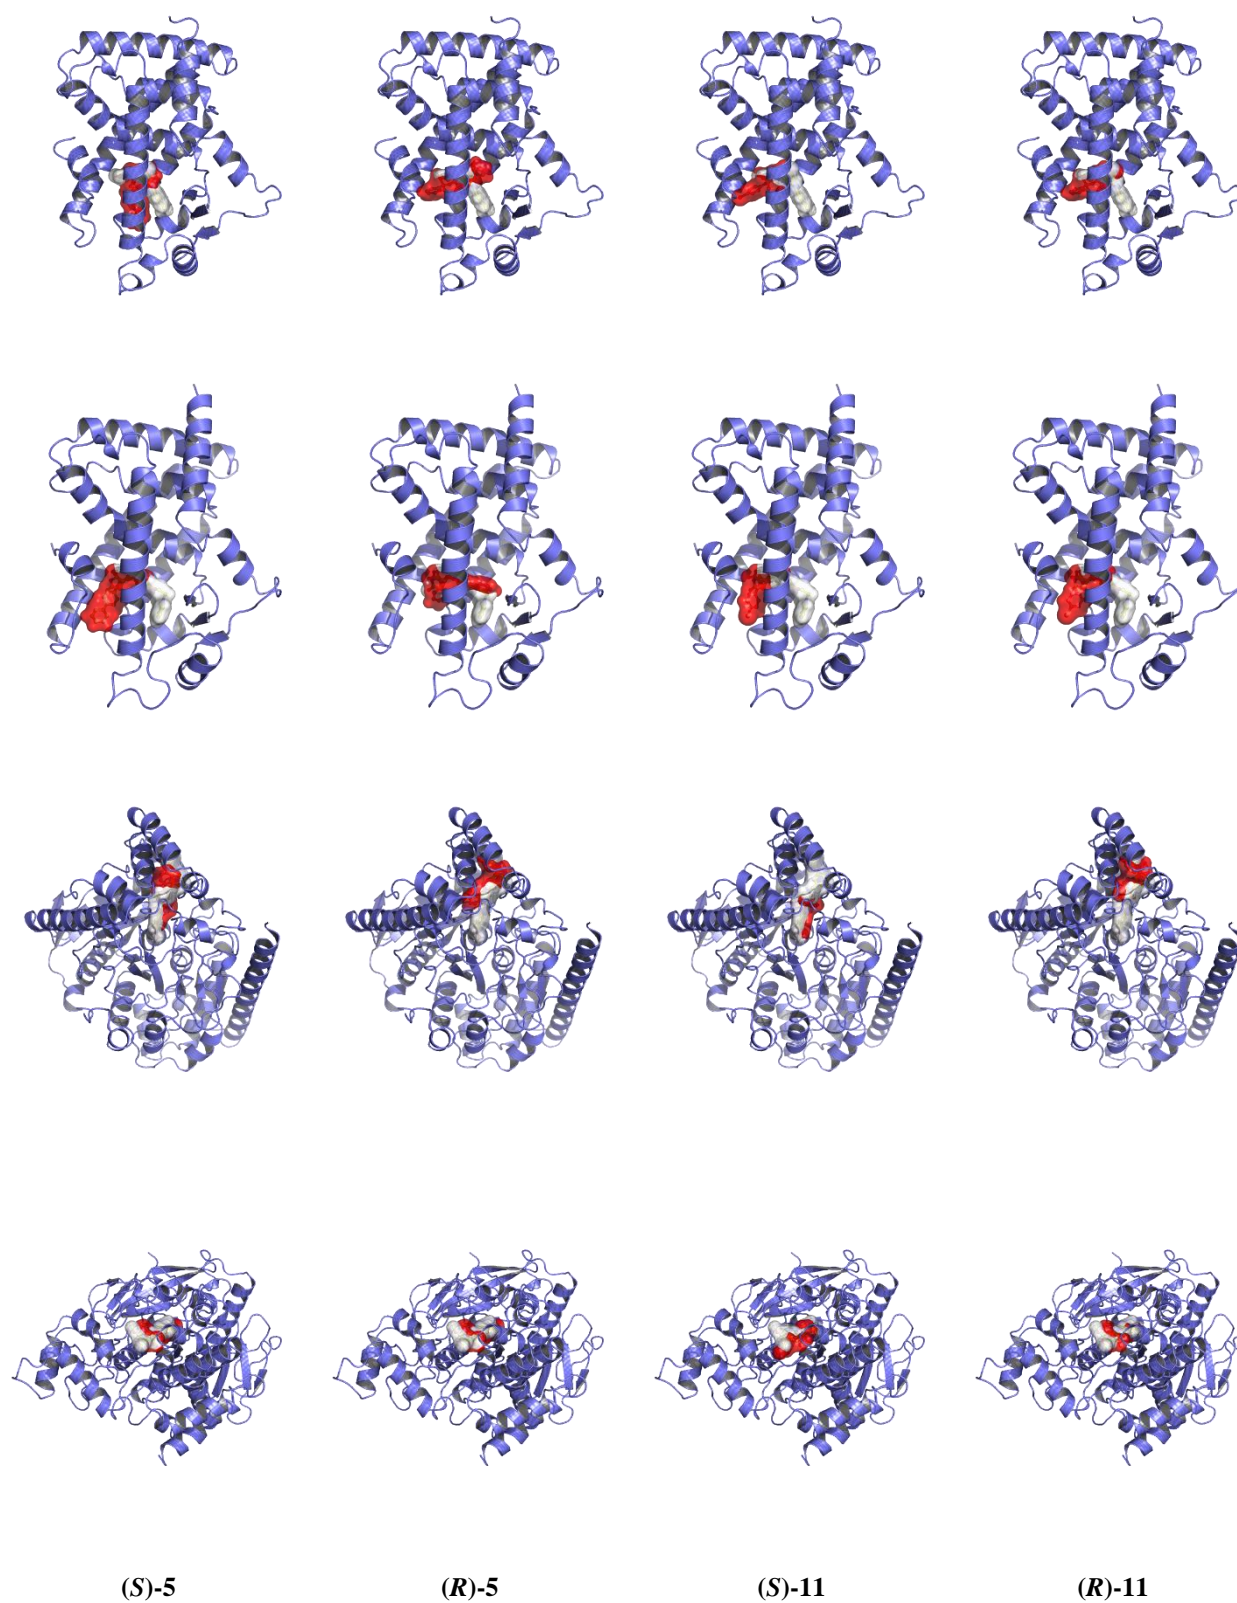

**Figure S1.** Full view of the binding mode to the selected targets (bottom to top: PPAR $\alpha$ , PPAR $\gamma$ , FAAH, AChE). The (*S*) and (*R*)-enantiomers of **5** and **11** and reference compounds (Wy-14,643, rosiglitazone, JZL195, donepezil) are depicted as red and white surface, respectively.
